# Supplementary material for: Computational Insights into the Interaction of the Conserved Cysteine-Noose Domain of the Human Respiratory Syncytial Virus G Protein with the Canonical Fractalkine Binding site of Transmembrane Receptor CX3CR1 Isoforms
Source: MDPI journal article supplement (doi:10.3390/membranes14040084), 2024-04-04
Supplement: s1 [file s1]

# **Computational Insights into the Interaction of the Conserved Cysteine-Noose Domain of the Human Respiratory Syncytial Virus G Protein with the Canonical Fractalkine Binding Site of Transmembrane Receptor CX3CR1 Isoforms**

João Victor Piloto<sup>1,†</sup>; Raphael Vinicius Rodrigues Dias<sup>1,†</sup>; Wan Suk Augusto Mazucato<sup>1</sup>, Marcelo Andres Fossey<sup>1</sup>, Fernando Alves de Melo<sup>1</sup>, Fabio Ceneviva Lacerda Almeida<sup>2</sup>, Fatima Pereira de Souza<sup>1</sup>, Icaro Putinhon Caruso<sup>1,\*</sup>

<sup>1</sup>Multiusers Center for Biomolecular Innovation (CMIB), Department of Physics, São Paulo State University (UNESP), São José do Rio Preto 15054-000, Brazil.

<sup>2</sup>Institute of Medical Biochemistry (IBqM), National Center of Nuclear Magnetic Resonance Jiri Jonas, Federal University of Rio de Janeiro, Rio de Janeiro 21941-902, Brazil.

† The authors contributed equally to this work.

**\*Address correspondence to:** Icaro Putinhon Caruso, São Paulo State University "Júlio de Mesquita Filho" - UNESP, Institute of Biosciences, Humanities and Exact Sciences - IBILCE, Department of Physics, Rua Cristóvão Colombo, 2265, CEP 15054-000, São José do Rio Preto, São Paulo, Brazil, Tel.: +55-17-3221-2515, e-mail: [icaro.caruso@unesp.br](mailto:icaro.caruso@unesp.br)

## SUPPLEMENTARY MATERIAL

**Figure S1.** Alignment of amino acid sequences for the isoforms of the cellular receptor CX3CR1 conducted using the Clustal Omega server. The primary sequence of isoform 1 is represented in black, isoform 2 in red, isoform 3 in blue, and isoform 4 in green. It is noteworthy that isoforms 2 and 4 exhibit 32 additional residues compared to isoform 1, while isoform 3 contains 7 extra residues relative to isoform 1.

```

Isoform 1      -----MDQFPESVTENFEYDDLAEACYIGDIVV
Isoform 2      MREPLEALKLADLDFRKSSLASGWRMASGAFTMDQFPESVTENFEYDDLAEACYIGDIVV
Isoform 3      -----MASGAFTMDQFPESVTENFEYDDLAEACYIGDIVV
Isoform 4      MREPLEAFKLADLDFRKSSLASGWRMASGAFTMDQFPESVTENFEYDDLAEACYIGDIVV
                *****

Isoform 1      FGTVFLSIFYSVIFAIGLVGNLLVVFALTNSKKPKSVTDIYLLNLALSDDLFLVATLPFWT
Isoform 2      FGTVFLSIFYSVIFAIGLVGNLLVVFALTNSKKPKSVTDIYLLNLALSDDLFLVATLPFWT
Isoform 3      FGTVFLSIFYSVIFAIGLVGNLLVVFALTNSKKPKSVTDIYLLNLALSDDLFLVATLPFWT
Isoform 4      FGTVFLSIFYSVIFAIGLVGNLLVVFALTNSKKPKSVTDIYLLNLALSDDLFLVATLPFWT
                *****

Isoform 1      HYLINEKGLHNAMCKFTTAAFFFIGFFGSIFFITVISIDRYLAIVLAANSMNRTVQHGV
Isoform 2      HYLINEKGLHNAMCKFTTAAFFFIGFFGSIFFITVISIDRYLAIVLAANSMNRTVQHGV
Isoform 3      HYLINEKGLHNAMCKFTTAAFFFIGFFGSIFFITVISIDRYLAIVLAANSMNRTVQHGV
Isoform 4      HYLINEKGLHNAMCKFTTAAFFFIGFFGSIFFITVISIDRYLAIVLAANSMNRTVQHGV
                *****

Isoform 1      ISLGVWAAAILVAAPQFMFTKQKENECLGDYPEVLQEIWPVLRNVETNFLGFLPLLIMS
Isoform 2      ISLGVWAAAILVAAPQFMFTKQKENECLGDYPEVLQEIWPVLRNVETNFLGFLPLLIMS
Isoform 3      ISLGVWAAAILVAAPQFMFTKQKENECLGDYPEVLQEIWPVLRNVETNFLGFLPLLIMS
Isoform 4      ISLGVWAAAILVAAPQFMFTKQKENECLGDYPEVLQEIWPVLRNVETNFLGFLPLLIMS
                *****

Isoform 1      YCYFRIIQTLFSCKNHKKAKAIKILLVVIVFFLFWTPYNVMIFLETCLKLYDFFPSCDMR
Isoform 2      YCYFRIIQTLFSCKNHKKAKAIKILLVVIVFFLFWTPYNVMIFLETCLKLYDFFPSCDMR
Isoform 3      YCYFRIIQTLFSCKNHKKAKAIKILLVVIVFFLFWTPYNVMIFLETCLKLYDFFPSCDMR
Isoform 4      YCYFRIIQTLFSCKNHKKAKAIKILLVVIVFFLFWTPYNVMIFLETCLKLYDFFPSCDMR
                *****

Isoform 1      KDLRLALSVTETVAFSHCCLNPLIYAFAGEKFRRLYHLYGKCLAVLCGRSVHVDFFSSE
Isoform 2      KDLRLALSVTETVAFSHCCLNPLIYAFAGEKFRRLYHLYGKCLAVLCGRSVHVDFFSSE
Isoform 3      KDLRLALSVTETVAFSHCCLNPLIYAFAGEKFRRLYHLYGKCLAVLCGRSVHVDFFSSE
Isoform 4      KDLRLALSVTETVAFSHCCLNPLIYAFAGEKFRRLYHLYGKCLAVLCGRSVHVDFFSSE
                *****

Isoform 1      SQRSRHGSVLSSNFTYHTSDGDALLL
Isoform 2      SQRSRHGSVLSSNFTYHTSDGDALLL
Isoform 3      SQRSRHGSVLSSNFTYHTSDGDALLL
Isoform 4      SQRSRHGSVLSSNFTYHTSDGDALLL
                *****

```

**Figure S2.** Structural alignment of CX3CR1 from cryo-EM with models from servers RoseTTAFold and trRosetta. Structure of the CX3CR1 receptor resolved by cryo-EM (PBD 7XBX) colored in gray. The structures calculated via molecular modeling via RoseTTAFold and trRosetta are superimposed, with the RMSD values highlighted via a color gradient, going from blue to red.

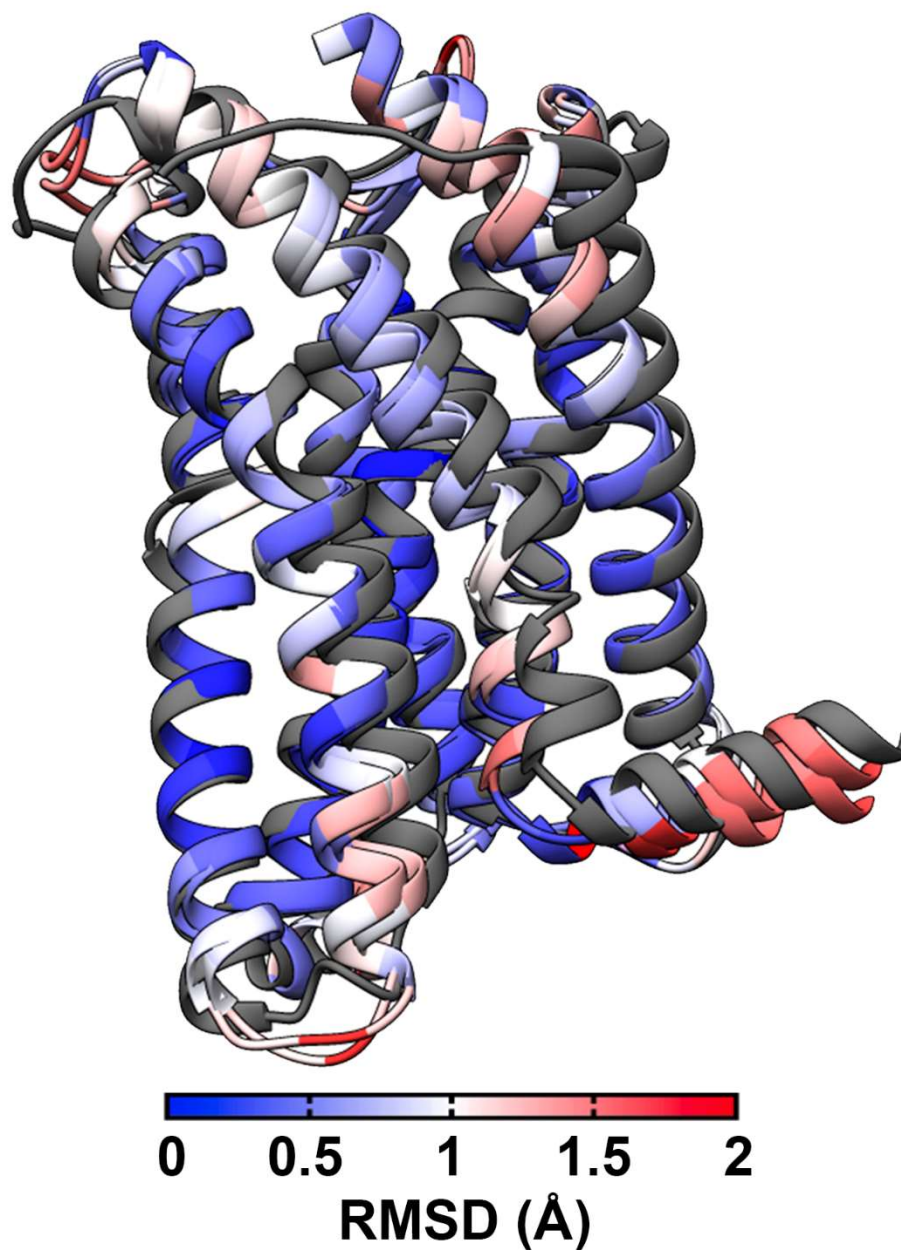

**Figure S3.** RMSD and number of contacts for the MD simulations of the structural models of isoform 2, 3 and 4. RMSD analysis of the main chain atoms (A) and the number of contacts  $< 0.6$  nm between the N-terminal residues and the  $\beta$ -strand Glu174–Gly177 in the ECL2 region (B) along the 300 ns MD trajectories for the structural models of isoforms 2 (black), 3 (red), and 4 (blue) determined by the RoseTTAFold servers.

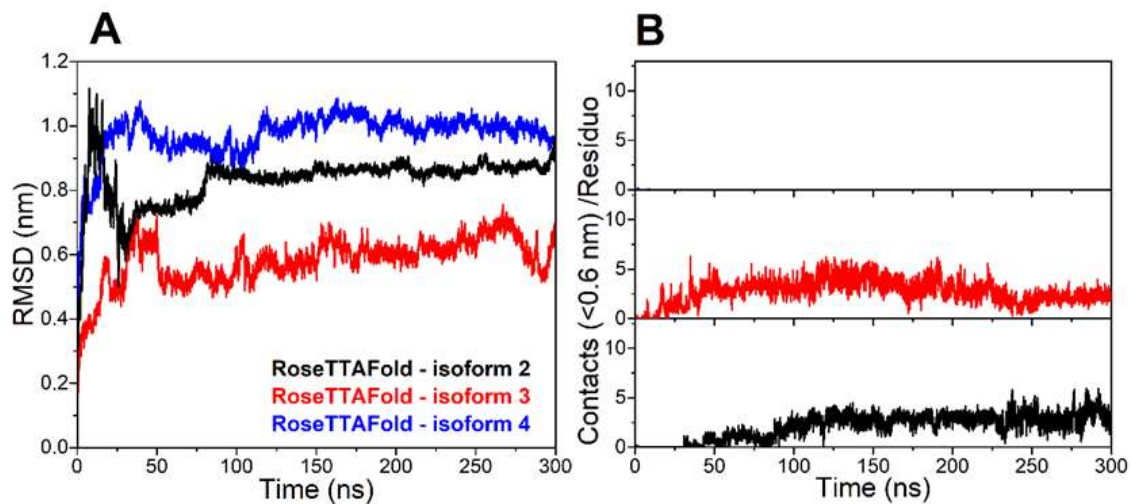



**Figure S4.** Representative structures of CX3CR1 isoforms 2, 3, and 4 in POPC lipid bilayer. The representative structures for isoform 2 (A), isoform 3 (B), and isoform 4 (C) in a POPC lipid bilayer were obtained through cluster analysis of the 300 ns MD simulations. The protein is depicted in a cartoon model, and lipids are represented as sphere and line models. The barrel of  $\alpha$ -helices of the protein is denoted in gray, the N-terminal region in yellow, and the C-terminal region in orange. The phosphorus atom of the lipid polar head is shown as a blue sphere, and the hydrophobic tail as gray lines.

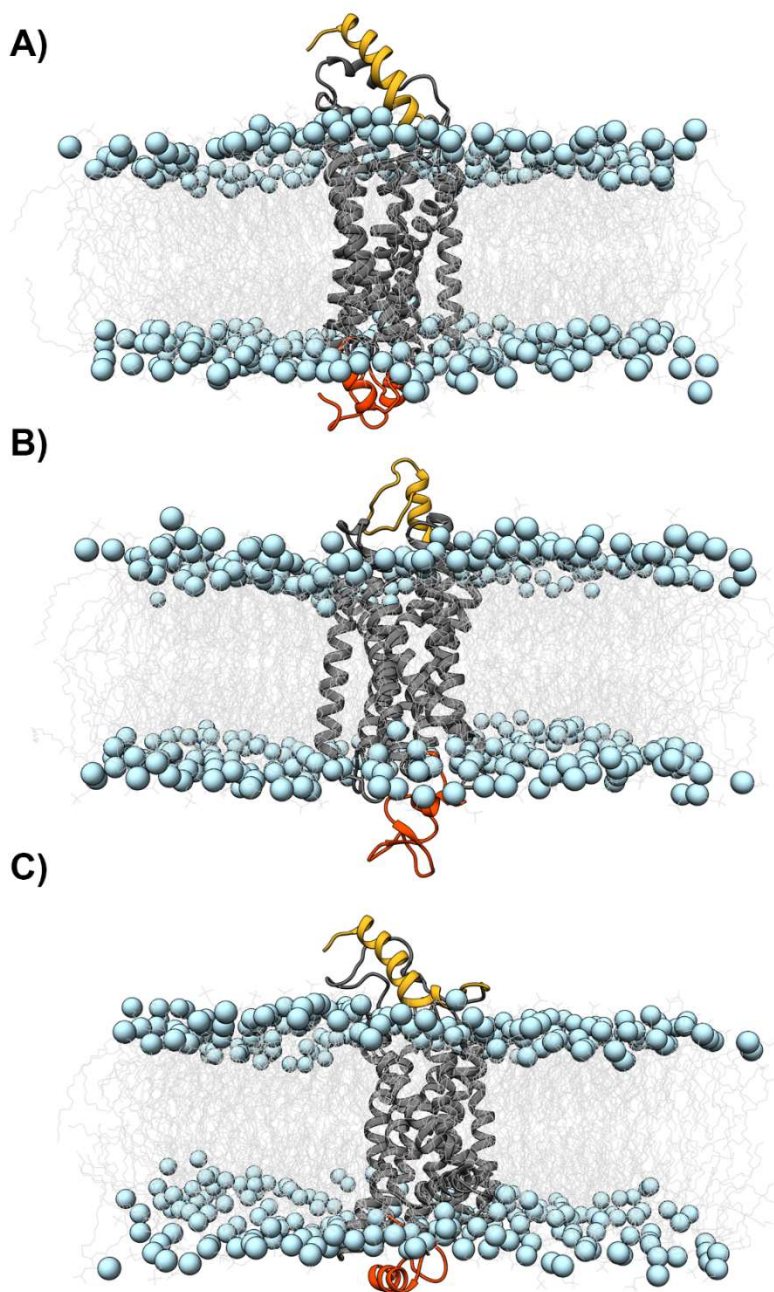

**Figure S5.** Mass density profile for the POPC lipid bilayer for the four MD simulations with the CX3CR1 isoforms. The profile for the simulations with the isoform 1 is presented in (A), 2 in (B), 3 in (C), and 4 in (D). The bilayer thickness is determined by the P8-P8 distance. The apolar part of the POPC bilayer is indicated by a black line, P8 phosphorus atoms with a red line, the protein with a green line, and water molecules with a blue line.

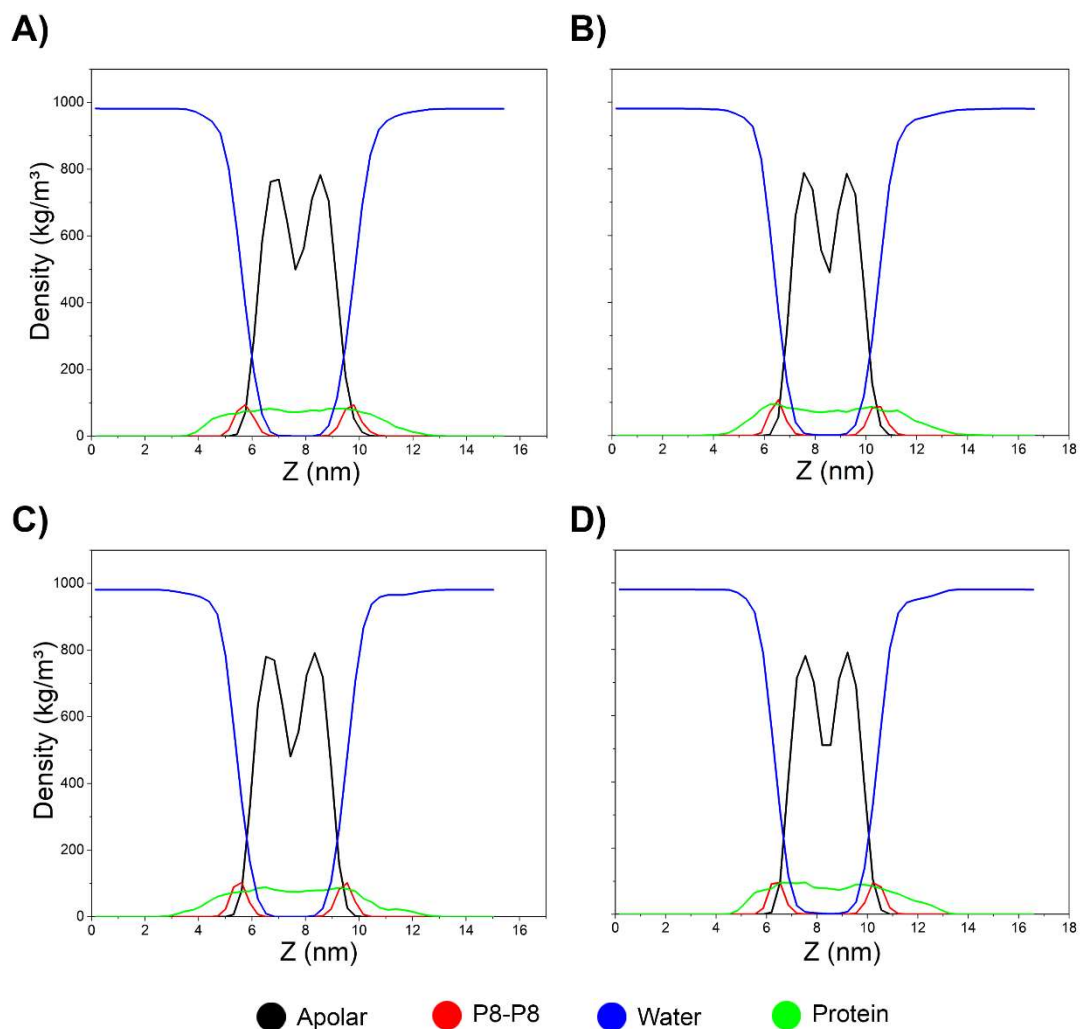

**Figure S6.** Tridimensional structure of the US28/fractalkine and CX3CR1/fractalkine complexes. (Left) Structure (PDB 5WB2) of the complex formed between fractalkine CX3CL1 (magenta) and the homologous receptor US28 (gray). (Right) Structure of the CX3CR1 receptor resolved by cryo-EM (PDB 7XBX) anchored with the fractalkine (CX3CL1). The proteins are represented using the cartoon model. The corresponding  $\beta$ -strands in the ECL2 region of the CX3CR1 homolog (Glu174–Gly177) is highlighted in cyan in the protein's binding cavity.

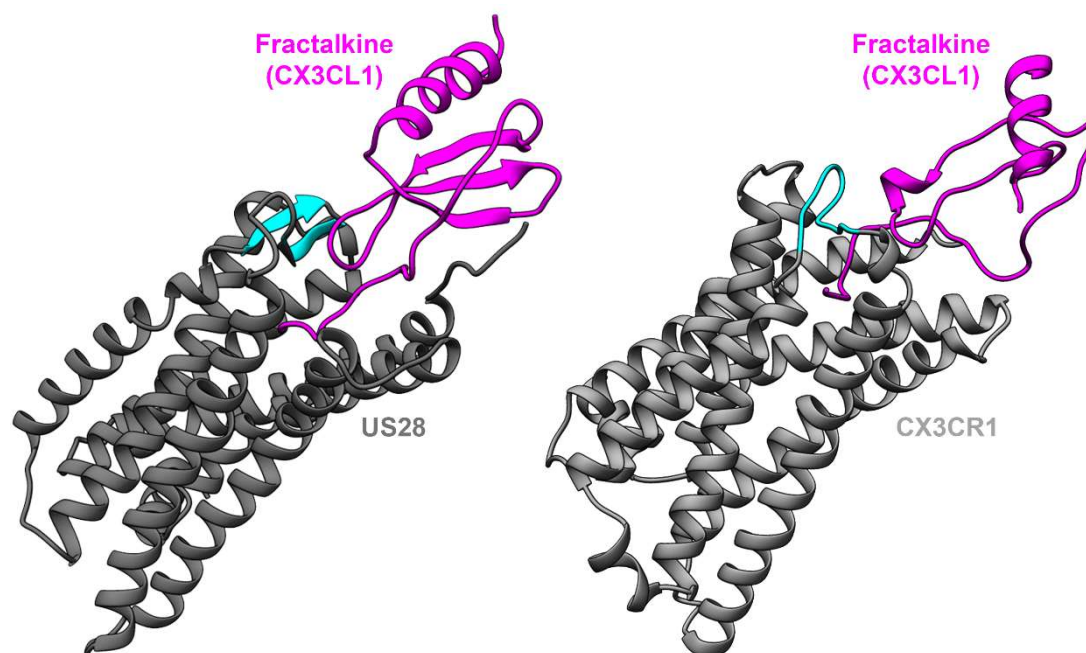

**Figure S7.** Number of contacts between CX3CR1 isoforms and cndG in the complexes from ClusPro and HADDOCK. The number of contacts  $< 0.6$  nm determined between the atoms of the isoforms and cndG over the 300 ns simulation for the structural models of the complexes calculated by ClusPro (left) and HADDOCK (right). The results for each isoform are presented in the following color scheme: black for isoform 1, red for 2, blue for 3, and cyan for 4.

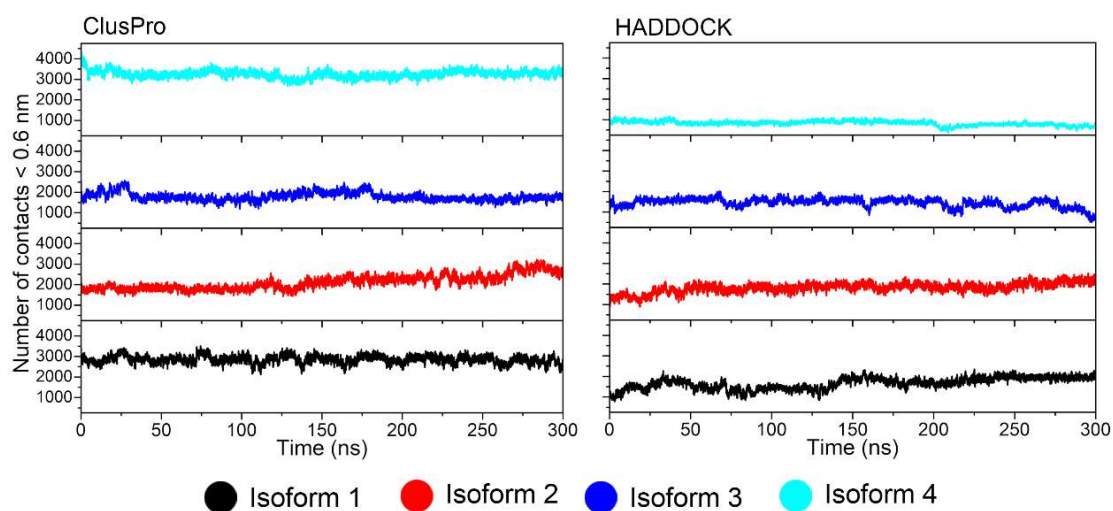



**Figure S8.** Comparison between the positions of the cndG in the structural models of the molecular docking calculations and in the representative structures of the complexes from MD simulations. The structural models of the CX3CR1/cndG complexes from ClusPro and HADDOCK are denoted in (A) and (B), respectively. The protein is presented as a cartoon model. The cndG is shown as a cartoon in magenta for the docking model and in yellow for the representative structure from clustering analysis.

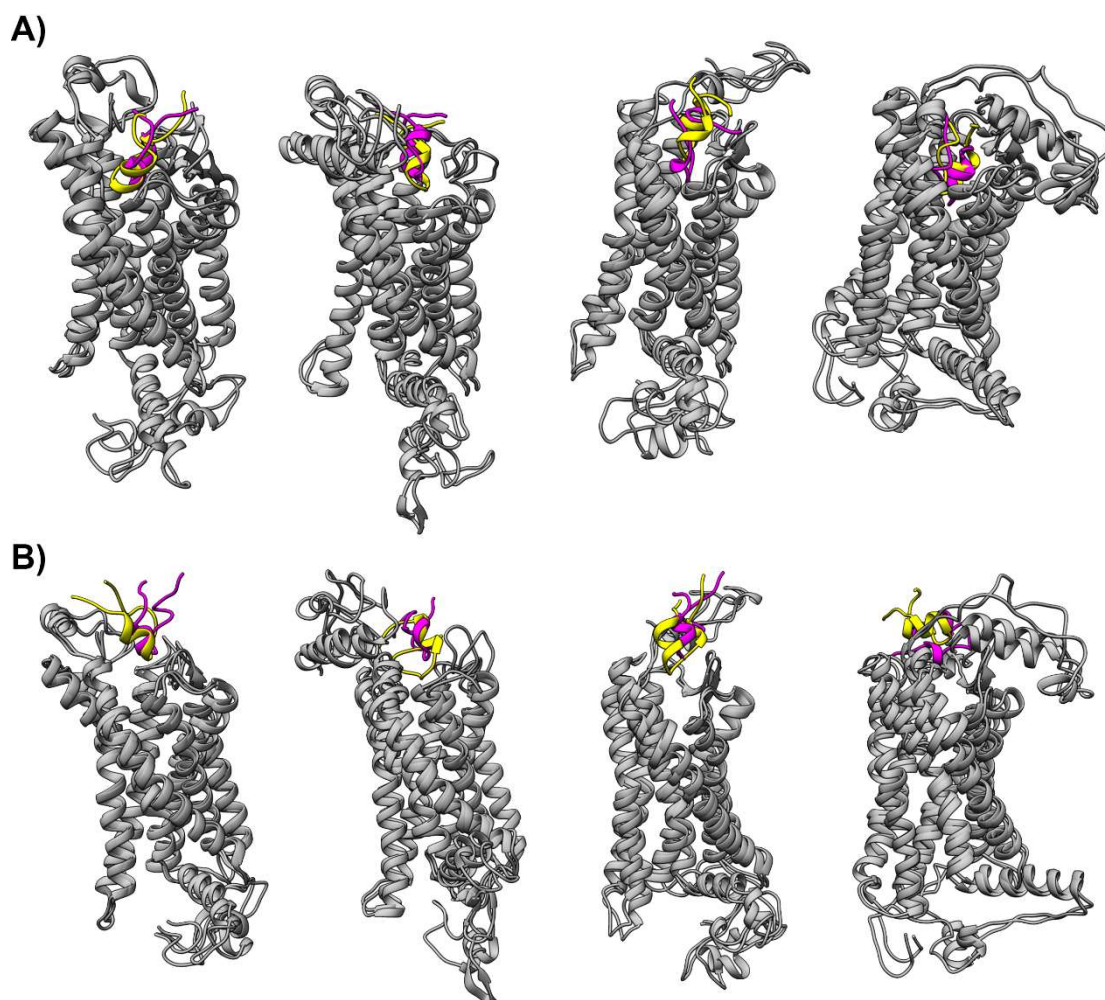

**Figure S9.** RMSD values of the CX3CR1 isoforms and cndG along the MD simulations. The values of RMSD calculated for the main chain atoms of the isoforms and the cndG over the 300 ns MD simulation for the structural models of the complexes determined by the servers ClusPro and HADDOCK. The results for each isoform are presented in the following color scheme: black for isoform 1, red for 2, blue for 3, and cyan for 4.

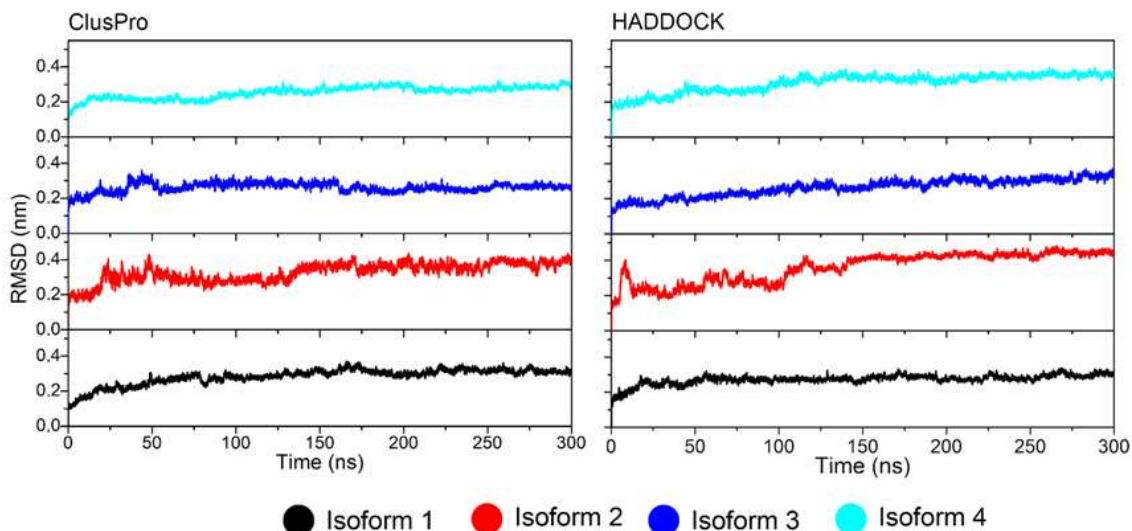

**Figure S10.** Number of CX3CR1/cndG hydrogen bonds along the MD simulations. The values of number of hydrogen bonds calculated between atoms of the isoforms and the cndG over the 300 ns MD simulation for the structural models of the complexes determined by the servers ClusPro and HADDOCK. The results for each isoform are presented in the following color scheme: black for isoform 1, red for 2, blue for 3, and cyan for 4.

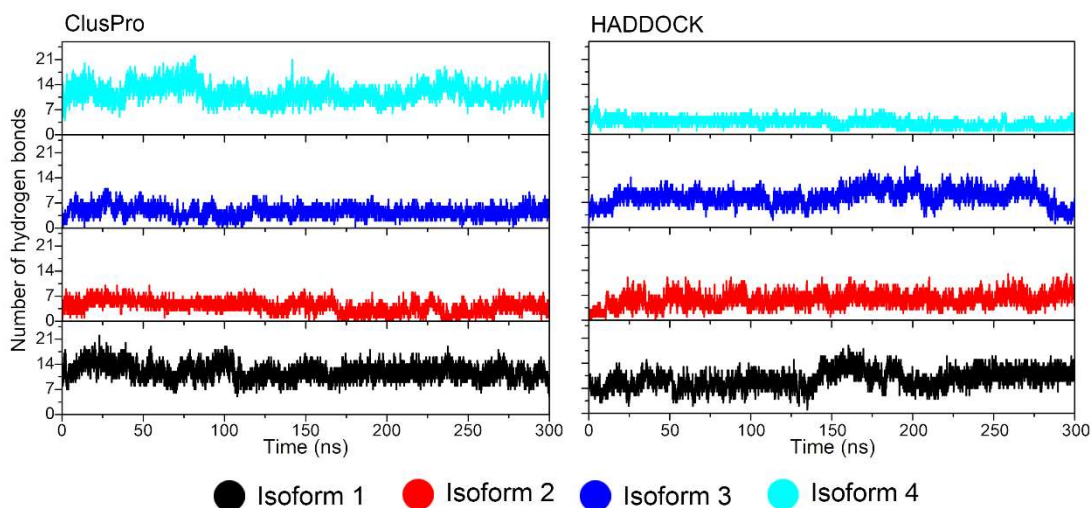

**Figure S11.** Energy contributions of the residues of CX3CR1 isoforms and cndG to total binding free energy of the complexes for the structural models from server ClusPro. Favorable (red) and unfavorable (blue) contributions of the amino acid residues of the CX3CR1 isoforms (A) and cndG (B) in the four complexes calculated via MM-GBSA along the MD trajectories.

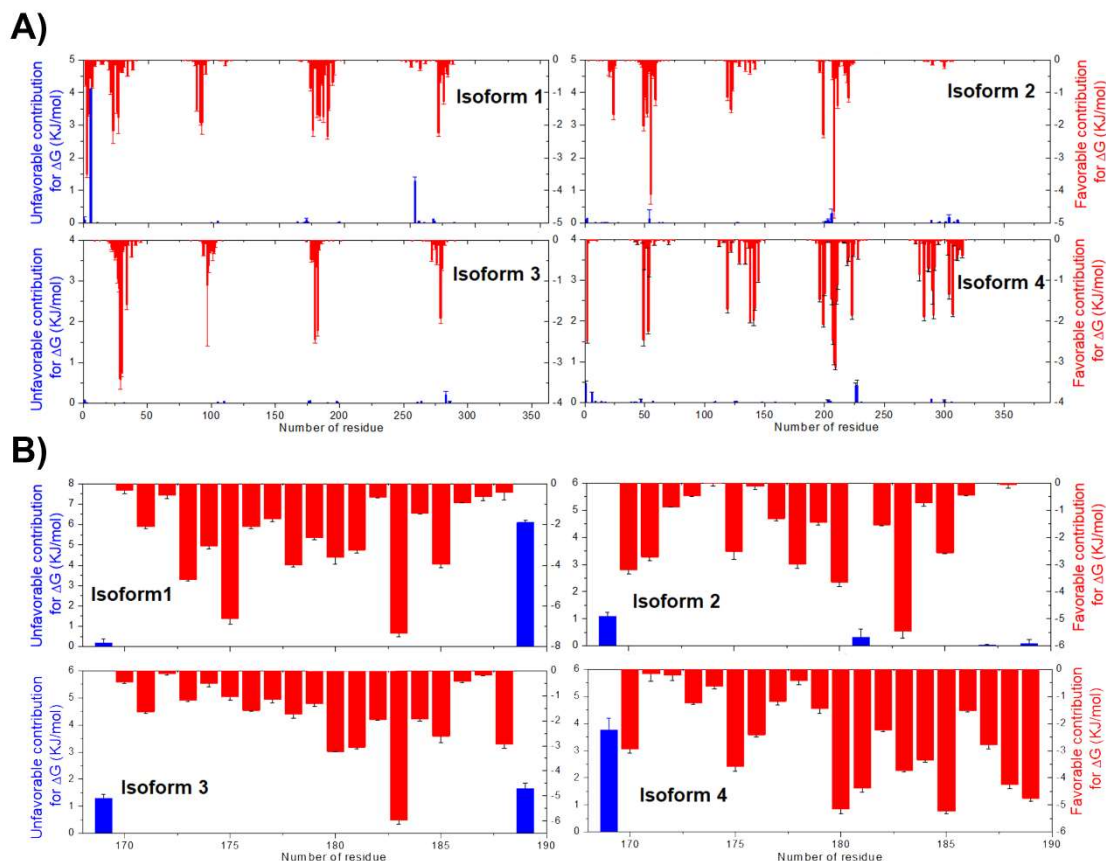

**Figure S12.** Energy contributions of the residues of CX3CR1 isoforms and cndG to total binding free energy of the complexes for the structural models from server HADDOCK. Favorable (red) and unfavorable (blue) contributions of the amino acid residues of the CX3CR1 isoforms (A) and cndG (B) in the four complexes calculated via MM-GBSA along the MD trajectories.

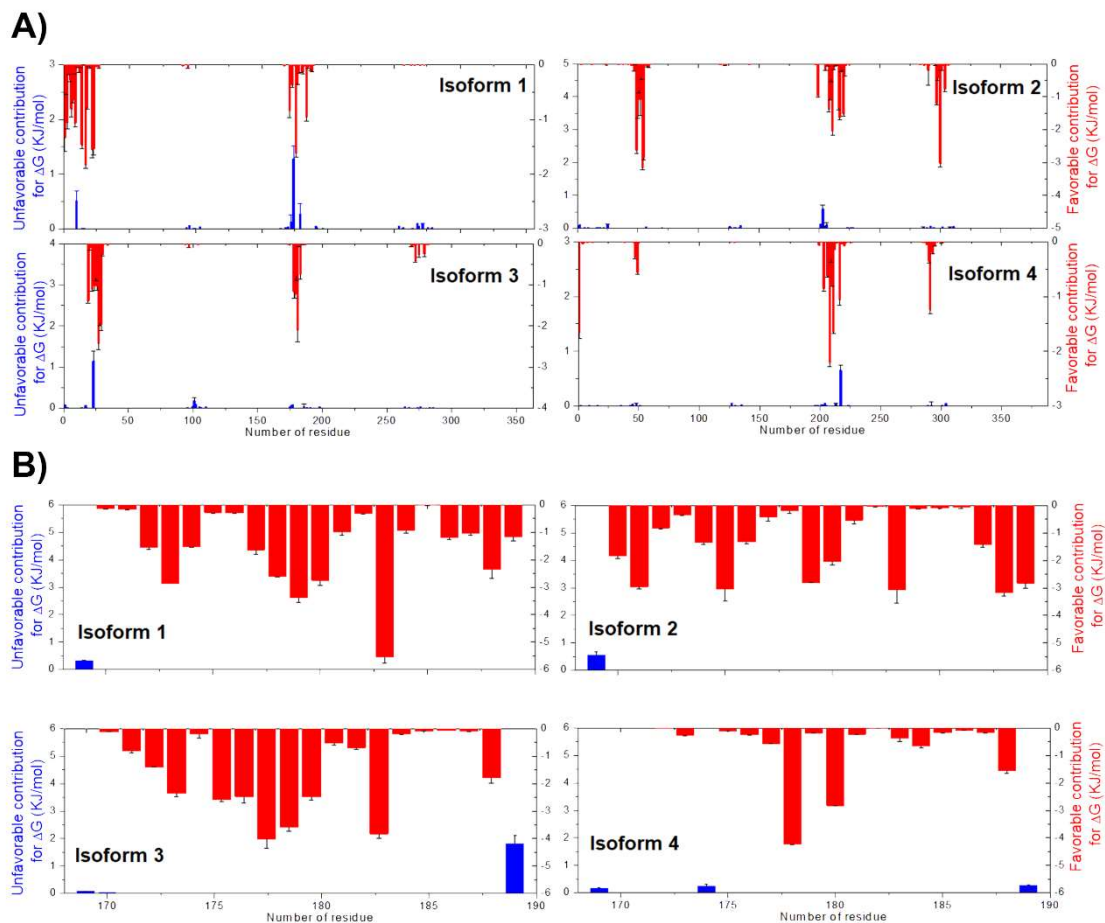



**Figure S13.** Sequence alignment of CX3CR1 and US28 receptors and comparison of its residues in the binding cavity. (A) Sequence alignment for the amino acid residue sequences of CX3CR1 (top, yellow) and US28 (bottom, red). (B and C) Residue numbering for CX3CR1 refers to its isoform 1. The key residues identified in the present study are highlighted in yellow in the residue sequence and denoted in the CX3CR1 isoform 1 structure in B while those reported in the literature for structural homologous US28 are highlighted in red in the sequence and indicated in this transmembrane receptor structure in C.

**A**

|     |                                                                                                             |             |
|-----|-------------------------------------------------------------------------------------------------------------|-------------|
| 11  | NFEYD <b>D</b> LAEAC <b>I</b> GDIVVFGTVFLSIFYSVIFAIGLVGNLLVVFALTNSKKPKSVTDIYL                               | 70          |
|     | F+YD+ A C D++ Y V+F G +GN LV+F +T ++ + D+Y                                                                  |             |
| 13  | EFDYD <b>E</b> DATPCV <b>E</b> TDVLNQSKPVTFLYGVVFLFGSIGNFLVIFTITWRRRIQCSGDVYF                               | 72          |
| 71  | LNLA <del>SD</del> LLFVATLPFWTHYLINEKGLHNAMCKFTTAAFFFIGFFGSIFFFITVISIDRYLA                                  | 130         |
|     | +NLA +DLLFV TLP W YL++ L + C TA F++ F S+ FIT I++DRY A                                                       |             |
| 73  | INLAAADLLFVCTLPWLMQYLLDHNSLASVPCTLLTACFYVAMFASLCFITEIALDRYYA                                                | 132         |
| 131 | IVLAANSMMNRTVQHGV <del>TIS</del> LGWAAAILVAAPQFMFTK <b>K</b> ENE <b>C</b> L <b>G</b> D <b>Y</b> PEVLQEIWPVL | 190         |
|     | IV M R V+ S+ W A+++A P FM + <b>K</b> + <b>N</b> + <b>C</b> + <b>D</b> <b>Y</b> + L+ +P++                    |             |
| 133 | IVY----MRYRPVKQACLF <del>SIF</del> FWWIFAVIIAIPHFMVVT <b>K</b> DN <b>C</b> M <b>D</b> <b>E</b> -DYLEVSYPII  | 187         |
|     |                                                                                                             | ECL2 Region |
| 191 | RNVETNFGFLPLLLIMSYCYFRIIQTLFSCKNHKKAKAIKLILLVVIVFFLFWTPYNVM                                                 | 250         |
|     | NVE F++PL ++SYCY+RI + + ++ K + +++++ VV+VF +FW PY++                                                         |             |
| 188 | LNVELMLGAFVIPLSVISYCYRISRIVAVSQSRHKGRIVRVLIAVVLVFIIFWLPYHLT                                                 | 247         |
| 251 | IFLETCLKLYDFF-PSCDMRKDL <b>R</b> LALSVT <b>E</b> TVAFSHCCLNPLIYAFAGEKFRRYLYHLYG                             | 309         |
|     | +F++TLKL + SC+ + L+ AL + <b>E</b> ++AF HCCLNPL+Y F G KFR+ L+ L                                              |             |
| 248 | LFVDTLKLLKWISSCEFERSL <b>R</b> ALILT <b>E</b> SLAFCHCCLNPLLYVFGTKFRQELHCLLA                                 | 307         |
| 310 | KCLAVLCGRSV                                                                                                 | 320         |
|     | + L R V                                                                                                     |             |
| 308 | EFRQLFSRDV                                                                                                  | 318         |

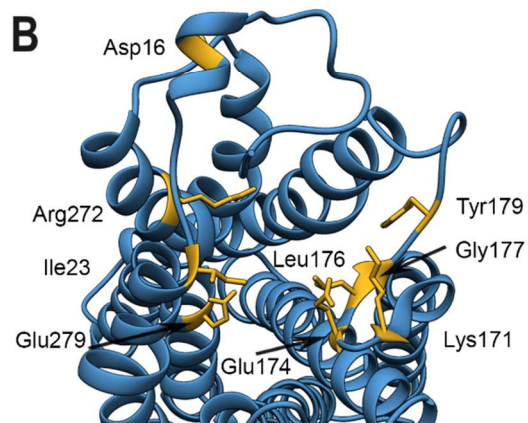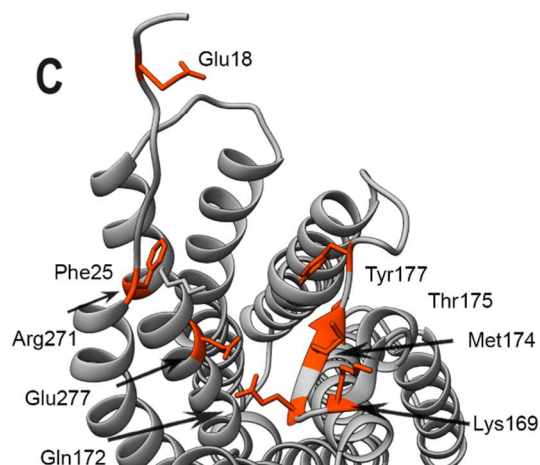



**Figure S14.** Multiple sequence alignment for homologous CX3CR1s of different species. The analyzed sequences were of *Homo sapiens* (isoform 1 of the present study), *Bos taurus*, *Chimpanzee*, *Mus musculus*, and *Sigmodon hispidus* from NCBI id ABS29268.1, ADD82806.1, NP\_001139725.1, NP\_034117.3, and QWL12666.1, respectively. The key residues identical and different to those in the *Homo sapiens* CX3CR1 sequence are highlighted in yellow and red, respectively. Sequence homology between CX3CR1 is denoted by asterisk (\*), colon (:), and period (.). The asterisk indicates fully conserved residue, colon represents conservation between groups of strongly similar properties (scoring > 0.5), and period indicates conservation between groups of weakly similar properties (scoring ≤ 0.5).

|                   |                                                                |     |
|-------------------|----------------------------------------------------------------|-----|
| Bos Taurus        | MHTTLPESTSENFEYDDLAEEVCDIGDIVALGTVFVVILYSLVFAFGLVGNLLVVFALINS  | 60  |
| Homo Sapiens      | -MDQFPESVTENFEYDDLAEEACVIGDIVVFGTVFLSIFYSVIFAIGLVGNLLVVFALINS  | 59  |
| Chimpanzee        | -MYQFPESVTENFEYDDLAEEACVIGDIVVFGTVFLSIFYSVIFAIGLVGNLLVVFALINS  | 59  |
| Mus Musculus      | MSTSFPELDLENFEYDDSAEACVIGDIVAFGTIFLSVIFYALVFTFGLVGNLLVVLALINS  | 60  |
| Sigmodon Hispidus | MPTFFPGLEDENFEYDDSAEACVIGDIVAFGSIFMSILYSLVFAFGLVGNLLVVLALINS   | 60  |
|                   | :* ***** * * * * :***** :***** :***** :***** :***** :*****     |     |
| Bos Taurus        | QRKSITDIYLLNLALSNDLLFVATLPFWTHYVINEQGLHHATCKLITAFFFIGFFGGIFF   | 120 |
| Homo Sapiens      | KKPKSVTDIYLLNLALSNDLLFVATLPFWTHYLINEKGLHNAMCKFTTAAFFFIGFFGSIFF | 119 |
| Chimpanzee        | KKPKSVTDIYLLNLALSNDLLFVATLPFWTHYLINEKGLHNAMCKFTTAAFFFIGFFGSIFF | 119 |
| Mus Musculus      | RKPKSITDIYLLNLALSNDLLFVATLPFWTHYLSHEGLHNAMCKLTAAFFFIGFFGGIFF   | 120 |
| Sigmodon Hispidus | RKPKSITDIYLLNLALSNDLLFVATLPFWVHYIIEEGLHNAMCKLTAAFFFIGFFGGIFF   | 120 |
|                   | : : ***** :***** :***** :***** :***** :***** :*****            |     |
| Bos Taurus        | ITVISDRFLAIVLAANSMSNRTVQHGVTTSLGVWAAAILAATPQFMFTREKENECGLDY    | 180 |
| Homo Sapiens      | ITVISIDRYLAIVLAANSMSNRTVQHGVTTSLGVWAAAILVAAPQFMFTKQKENECLGDY   | 179 |
| Chimpanzee        | ITVISIDRYLAIVLAANSMSNRTVQHGVTTSLGVWAAAILVAAPQFMFTKQKENECLGDY   | 179 |
| Mus Musculus      | ITVISIDRYLAIVLAANSMSNRTVQHGVTTSLGVWAAAILVASPQFMFTKQKENECLGDY   | 180 |
| Sigmodon Hispidus | ITVISIDRYLAIVLAANSMSNRTVQHGVTTSLGVWAAAILVAAPQFMFTKQKENECLGDY   | 180 |
|                   | ***** :***** :***** :***** :***** :***** :***** :*****         |     |
| Bos Taurus        | PEILQEIWVILNTEINFLGFLPLLIMSYCYFRIMQTLFSCNHHKAKAIRLIFLVVVV      | 240 |
| Homo Sapiens      | PEVLQEIWVILNTEINFLGFLPLLIMSYCYFRIMQTLFSCNHHKAKAIKLILVVIV       | 239 |
| Chimpanzee        | PEVLQEIWVILNTEINFLGFLPLLIMSYCYFRIMQTLFSCNHHKAKAIKLILVVIV       | 239 |
| Mus Musculus      | PEVLQEMWVILNTEINFLGFLPLLIMSYCYFRIMQTLFSCNHHKAKARAVRILILVVFA    | 240 |
| Sigmodon Hispidus | PEVLQEIWVILNTEINFLGFLPLLIMSYCYFRIMQTLFSCNHHKAKARAVRILILVVV     | 240 |
|                   | ***** :***** :***** :***** :***** :***** :***** :*****         |     |
| Bos Taurus        | FFLFWTPYNVMIFLETQTLNLYDFPKCDVKRDLRLAISVTEITAFSHCCCLNPLIYAFAGEK | 300 |
| Homo Sapiens      | FFLFWTPYNVMIFLETQTLNLYDFPKCDMRKDLRLAISVTEITAFSHCCCLNPLIYAFAGEK | 299 |
| Chimpanzee        | FFLFWTPYNVMIFLETQTLNLYDFPKCDMRKDLRLAISVTEITAFSHCCCLNPLIYAFAGEK | 299 |
| Mus Musculus      | FFLFWTPYNMIFLETQTLNLYDFPKCDMRKDLRLAISVTEITAFSHCCCLNPLIYAFAGEK  | 300 |
| Sigmodon Hispidus | FFLFWTPYNMIFLETQTLNLYDFPKCDMRKDLRLAISVTEITAFSHCCCLNPLIYAFAGEK  | 300 |
|                   | ***** :***** :***** :***** :***** :***** :***** :*****         |     |
| Bos Taurus        | FRRLYLRKCLAVLCGHPVHTGFSP---ESQSRQDSILSSFTHY-TSDGEGSILL         | 358 |
| Homo Sapiens      | FRRLYHLYGKCLAVLCGRSVHVDFFS--SESQSRHGSVLSSNFTYHTSDGDALLL        | 355 |
| Chimpanzee        | FRRLYHLYGKCLAVLCGRSVHVDFFS--SESQSRHGSVLSSNFTYHTSDGDALLL        | 355 |
| Mus Musculus      | FRRLYHLYGKCLAVLCGHPVHTGFSP---ESQSRQDSILSSFTHY-TSDGEGSILL       | 354 |
| Sigmodon Hispidus | FRRLYHLYGKCLAVLCGHPVHTGFSP---ESQSRQDSILSSFTHY-TSDGEGSILL       | 354 |
|                   | ***** :***** :***** :***** :***** :***** :***** :*****         |     |

| Highlighted Key Residues                         |           |
|--------------------------------------------------|-----------|
| <span style="background-color: yellow;"> </span> | Identical |
| <span style="background-color: red;"> </span>    | Different |

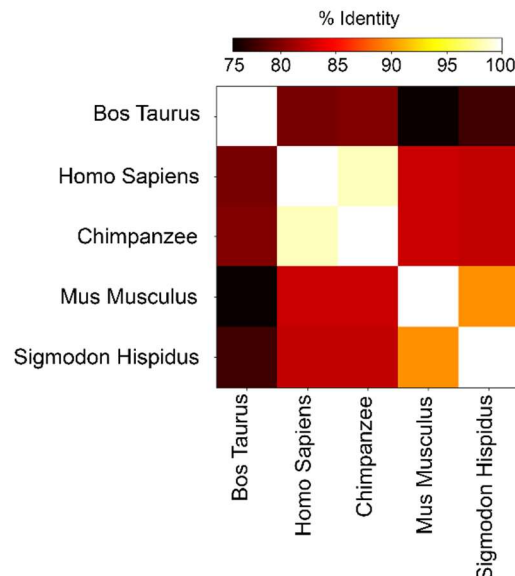

**Table S1.** Values of the percentages of the  $\psi$  and  $\phi$  torsional angles of the residues of the structural models of the CX3CR1 isoform 1 determined from Ramachandran plot.

| Residues                      | RoseTTAFold | trRosetta | AlphaFold | Phyre2 | I-tasser |
|-------------------------------|-------------|-----------|-----------|--------|----------|
| in most favored regions       | 92.7%       | 90.9%     | 88.1%     | 85.3%  | 77.1%    |
| in additional allowed regions | 6.1%        | 7.6%      | 9.5%      | 10.1%  | 17.7%    |
| in generously allowed regions | 0.6%        | 0.3%      | 0.6%      | 2.4%   | 3.4%     |
| in disallowed regions         | 0.6%        | 1.2%      | 1.8%      | 2.2%   | 1.8%     |

**Table S2.** Percentage of persistence of hydrogen bonds > 10% for the structural models of the complexes of cndG with CX3CR1 isoforms 1, 2, 3, and 4 from ClusPro server. To differentiate from the protein, cndG residues are marked with an asterisk. The number in parentheses corresponds to the reference numbering of isoform 1.

| Donor     | Atom | Acceptor   | Atom | %Persistence |
|-----------|------|------------|------|--------------|
| Isoform 1 |      |            |      |              |
| Cys173*   | N    | Glu6       | OE1  | 70.484       |
| Cys173*   | N    | Glu6       | OE2  | 66.418       |
| Ser174*   | N    | Glu6       | OE1  | 59.872       |
| Ser174*   | N    | Glu6       | OE2  | 33.516       |
| Ile175*   | N    | Glu6       | OE1  | 30.689       |
| Ile175*   | N    | Glu6       | OE2  | 58.419       |
| Ser177*   | OG   | Glu254     | OE1  | 49.047       |
| Ser177*   | OG   | Glu254     | OE2  | 48.660       |
| Asn178*   | ND2  | Glu254     | OE1  | 43.114       |
| Asn178*   | ND2  | Glu254     | OE2  | 43.674       |
| Asn178*   | ND2  | Glu279     | OE1  | 15.051       |
| Asn178*   | ND2  | Glu279     | OE2  | 16.291       |
| Asn179*   | N    | Ser276     | OG   | 49.847       |
| Asn179*   | ND2  | Glu279     | OE1  | 39.181       |
| Asn179*   | ND2  | Glu279     | OE2  | 43.674       |
| Arg188*   | N    | Gln3       | OE1  | 23.610       |
| Arg188*   | NH1  | Cys21      | O    | 28.316       |
| Arg188*   | NH2  | Gln3       | OE1  | 14.558       |
| Arg188*   | NH2  | Cys21      | O    | 25.757       |
| Ile189*   | O    | Glu6       | OE1  | 63.991       |
| Ile189*   | O    | Glu6       | OE2  | 34.902       |
| Gln3      | NE2  | Ser174*    | OG   | 22.517       |
| Gln3      | NE2  | Cys186*    | O    | 19.104       |
| Gln184    | NE2  | Phe170*    | O    | 38.475       |
| Arg191    | NH2  | Cys176*    | O    | 10.439       |
| Arg191    | NH2  | Ser177*    | OG   | 15.065       |
| Arg191    | NH2  | Asn178*    | OD1  | 12.985       |
| Arg272    | NH1  | Ser177*    | OG   | 31.809       |
| Isoform 2 |      |            |      |              |
| Asn169*   | ND2  | Leu49 (17) | O    | 16.238       |
| Asn169*   | ND2  | Glu51 (19) | O    | 27.836       |
| Asn169*   | ND2  | Cys53 (21) | O    | 44.314       |
| Phe170*   | N    | Leu49 (17) | O    | 37.182       |

|                  |     |              |     |        |
|------------------|-----|--------------|-----|--------|
| Asn178*          | ND2 | Tyr122 (90)  | O   | 24.623 |
| Asn178*          | ND2 | Cys207 (175) | O   | 10.092 |
| Thr181*          | OG1 | Tyr54 (22)   | OH  | 40.288 |
| Arg188*          | NH1 | Tyr211 (179) | OH  | 10.932 |
| Tyr122 (90)      | OH  | Ser174*      | O   | 20.677 |
| <b>Isoform 3</b> |     |              |     |        |
| Ser177*          | OG  | Leu98 (91)   | O   | 81.802 |
| Asn178*          | N   | Tyr97 (90)   | O   | 66.378 |
| Asn179*          | ND2 | Arg279 (272) | O   | 22.357 |
| Asn179*          | ND2 | Ser283 (276) | OG  | 20.837 |
| Arg188*          | NE  | Glu181 (174) | OE1 | 11.918 |
| Arg188*          | NE  | Glu181 (174) | OE2 | 10.012 |
| Arg188*          | NH1 | Glu101 (94)  | O   | 11.998 |
| Arg188*          | NH2 | Glu101 (94)  | O   | 11.079 |
| Ile189*          | O   | Glu101 (94)  | OE1 | 12.945 |
| Ile189*          | O   | Glu101 (94)  | OE2 | 17.598 |
| Tyr29 (22)       | OH  | Pro172*      | O   | 13.811 |
| Arg279 (272)     | NE  | Asn178*      | OD1 | 24.170 |
| Arg279 (272)     | NH2 | Asn178*      | OD1 | 11.159 |
| Ser283 (276)     | OG  | Asn178*      | OD1 | 11.452 |
| <b>Isoform 4</b> |     |              |     |        |
| Asn169*          | N   | Thr287 (255) | OG1 | 13.478 |
| Asn169*          | N   | Asp292 (260) | OD1 | 11.385 |
| Asn169*          | ND2 | Tyr211 (179) | OH  | 19.051 |
| Asn169*          | ND2 | Asp292 (260) | OD1 | 18.491 |
| Asn169*          | ND2 | Asp292 (260) | OD2 | 21.810 |
| Ser177*          | OG  | Glu311 (279) | OE1 | 39.821 |
| Ser177*          | OG  | Glu311 (279) | OE2 | 14.825 |
| Asn178*          | N   | Glu311 (279) | OE1 | 26.410 |
| Asn178*          | N   | Glu311 (279) | OE2 | 23.197 |
| Asn178*          | ND2 | Tyr70 (38)   | OH  | 11.159 |
| Asn178*          | ND2 | Thr310 (278) | O   | 24.023 |
| Asn178*          | ND2 | Glu311 (279) | OE1 | 15.665 |
| Asn178*          | ND2 | Glu311 (279) | OE2 | 15.278 |
| Asn179*          | ND2 | Thr227 (195) | OG1 | 46.434 |
| Asn179*          | ND2 | Tyr279 (247) | OH  | 75.497 |
| Thr181*          | OG1 | Asn224 (192) | OD1 | 10.999 |
| Thr181*          | OG1 | Glu226 (194) | OE2 | 45.661 |
| Thr181*          | OG1 | Thr227 (195) | OG1 | 20.184 |
| Lys187*          | NZ  | Gly209 (177) | O   | 45.421 |
| Lys187*          | NZ  | Asp210 (178) | OD1 | 13.545 |
| Lys187*          | NZ  | Asp210 (178) | OD2 | 14.371 |
| Lys187*          | NZ  | Tyr211 (179) | OH  | 17.651 |
| Arg188*          | N   | Cys207 (175) | O   | 96.121 |
| Ile189*          | N   | Glu206 (174) | OE1 | 32.742 |
| Ile189*          | N   | Glu206 (174) | OE2 | 65.298 |
| Gly209 (177)     | N   | Cys186*      | O   | 88.748 |
| Tyr211 (179)     | OH  | Asn169*      | OD1 | 21.064 |
| Asn228 (196)     | ND2 | Asn179*      | OD1 | 13.012 |
| Arg300 (268)     | NH1 | Asn169*      | OD1 | 21.370 |

|              |     |         |     |        |
|--------------|-----|---------|-----|--------|
| Arg300 (268) | NH2 | Asn169* | OD1 | 15.118 |
| Arg304 (272) | NE  | Ser174* | OG  | 27.076 |

**Table S3.** Percentage of persistence of hydrogen bonds > 10% for the structural models of the complexes of cndG with CX3CR1 isoforms 1, 2, 3, and 4 from HADDOCK server. To differentiate from the protein, cndG residues are marked with an asterisk. The number in parentheses corresponds to the reference numbering of isoform 1.

| Donor     | Atom | Acceptor     | Atom | %Persistence |
|-----------|------|--------------|------|--------------|
| Isoform 1 |      |              |      |              |
| Cys173*   | N    | Glu10        | OE1  | 41.861       |
| Cys173*   | N    | Glu10        | OE2  | 41.381       |
| Ser174*   | N    | Glu10        | OE1  | 45.181       |
| Ser174*   | N    | Glu10        | OE2  | 43.141       |
| Ser174*   | OG   | Glu10        | OE1  | 33.062       |
| Ser174*   | OG   | Glu10        | OE2  | 33.622       |
| Ser177*   | OG   | Glu6         | OE1  | 12.718       |
| Ser177*   | OG   | Glu6         | OE2  | 11.678       |
| Asn178*   | N    | Glu6         | O    | 21.837       |
| Asn178*   | ND2  | Glu6         | OE1  | 14.531       |
| Asn178*   | ND2  | Glu6         | OE2  | 14.865       |
| Asn178*   | ND2  | Gly177       | O    | 23.850       |
| Asn178*   | ND2  | Tyr179       | OH   | 44.394       |
| Asn179*   | ND2  | Lys171       | O    | 11.812       |
| Asn179*   | ND2  | Glu172       | OE1  | 17.051       |
| Asn179*   | ND2  | Glu172       | OE2  | 16.318       |
| Asn179*   | ND2  | Glu174       | OE1  | 23.863       |
| Asn179*   | ND2  | Glu174       | OE2  | 31.276       |
| Thr181*   | N    | Glu174       | OE1  | 44.967       |
| Thr181*   | N    | Glu174       | OE2  | 18.371       |
| Thr181*   | OG1  | Glu172       | OE1  | 15.985       |
| Thr181*   | OG1  | Glu172       | OE2  | 16.984       |
| Thr181*   | OG1  | Glu174       | OE1  | 49.740       |
| Thr181*   | OG1  | Glu174       | OE2  | 45.301       |
| Trp183*   | NE1  | Asp2         | O    | 18.011       |
| Met1      | N    | Trp183*      | O    | 11.972       |
| Met1      | N    | Cys186*      | O    | 18.691       |
| Gln3      | NE2  | Pro180*      | O    | 20.517       |
| Lys171    | NZ   | Ser177*      | OG   | 10.985       |
| Ly171     | NZ   | Ser177*      | O    | 12.265       |
| Lys171    | NZ   | Asn178*      | OD1  | 20.677       |
| Lys171    | NZ   | Asn178*      | O    | 23.664       |
| Tyr179    | N    | Asn178*      | OD1  | 12.185       |
| Gln184    | NE2  | Ser174*      | O    | 11.812       |
| Isoform 2 |      |              |      |              |
| Ser177*   | N    | Tyr211 (179) | OH   | 73.350       |
| Ser177*   | OG   | Tyr211 (179) | OH   | 26.010       |
| Asn179*   | ND2  | Gly209 (177) | O    | 76.496       |
| Asn179*   | ND2  | Asp210 (178) | OD1  | 26.690       |

|                  |     |              |     |        |
|------------------|-----|--------------|-----|--------|
| Asn179*          | ND2 | Asp210 (178) | OD2 | 25.117 |
| Ile189*          | N   | Leu49 (17)   | O   | 44.514 |
| Lys203 (171)     | NZ  | Thr181*      | OG1 | 12.425 |
| Gln216 (184)     | NE2 | Asn169*      | O   | 19.784 |
| Arg300 (268)     | NH2 | Cys176*      | O   | 21.904 |
| Arg304 (272)     | NH1 | Asn178*      | OD1 | 22.064 |
| Arg304 (272)     | NH2 | Asn178*      | OD1 | 18.264 |
| <b>Isoform 3</b> |     |              |     |        |
| Ser174*          | N   | Asp23 (16)   | OD1 | 18.144 |
| Ser174*          | N   | Asp23 (16)   | OD2 | 15.651 |
| Ser174*          | OG  | Asp23 (16)   | OD1 | 16.918 |
| Ser174*          | OG  | Asp23 (16)   | OD2 | 15.905 |
| Ser177*          | N   | Glu181 (174) | OE1 | 54.086 |
| Ser177*          | N   | Glu181 (174) | OE2 | 26.530 |
| Ser177*          | OG  | Asp22 (15)   | OD1 | 14.371 |
| Ser177*          | OG  | Asp22 (15)   | OD2 | 12.452 |
| Asn178*          | N   | Glu181 (174) | OE1 | 59.472 |
| Asn178*          | N   | Glu181 (174) | OE2 | 38.235 |
| Asn178*          | ND2 | Glu181 (174) | OE1 | 19.584 |
| Asn178*          | ND2 | Glu181 (174) | OE2 | 23.104 |
| Asn179*          | N   | Glu181 (174) | OE1 | 55.073 |
| Asn179*          | N   | Glu181 (174) | OE2 | 25.983 |
| Asn179*          | ND2 | Glu101 (94)  | OE1 | 40.968 |
| Asn179*          | ND2 | Glu101 (94)  | OE2 | 43.381 |
| Thr181*          | OG1 | Glu101 (94)  | OE1 | 23.264 |
| Thr181*          | OG1 | Glu101 (94)  | OE2 | 26.810 |
| Arg188*          | NH1 | Asp23 (16)   | O   | 18.011 |
| Ile189*          | O   | Asp23 (16)   | OD1 | 20.117 |
| Ile189*          | O   | Asp23 (16)   | OD2 | 22.424 |
| Cys28 (21)       | N   | Asn178*      | OD1 | 11.398 |
| Cys28 (21)       | N   | Asn178*      | O   | 35.155 |
| Tyr29 (22)       | N   | Asn178*      | O   | 14.611 |
| Lys178 (171)     | NZ  | Ser174*      | O   | 11.425 |
| Lys178 (171)     | NZ  | Ser177*      | OG  | 17.638 |
| Asn180 (173)     | ND2 | Ile175*      | O   | 10.972 |
| Asn180 (173)     | ND2 | Asn179*      | OD1 | 25.130 |
| <b>Isoform 4</b> |     |              |     |        |
| Ser174*          | OG  | Glu217 (185) | OE1 | 33.982 |
| Ser174*          | OG  | Glu217 (185) | OE2 | 31.916 |
| Asn178*          | N   | Gln216 (184) | OE1 | 21.117 |
| Asn178*          | ND2 | Gly209 (177) | O   | 96.947 |
| Lys203 (171)     | NZ  | Asn178*      | OD1 | 34.782 |
| Tyr211 (179)     | N   | Asn178*      | OD1 | 68.911 |



**Table S4.** The most significant contributions of binding free energy via MM-GBSA of the residues of isoform 1, 2, 3, and 4 for the structural models of the CX3CR1/cndG complexes from the ClusPro server. The values in brackets denote the value of average plus standard deviation calculated on the contribution of all amino acid residues. The most significant energy contributions correspond to values greater than that in the brackets. The number in parentheses corresponds to the reference numbering of isoform 1.

| Residue      | Favorable energy   | Residue      | Unfavorable energy |
|--------------|--------------------|--------------|--------------------|
| Isoform 1    |                    |              |                    |
|              | [<-0.5732) kJ/mol] |              | [>0.3003) kJ/mol]  |
| Asp2         | -0.75              | Glu6         | 4.13               |
| Gln3         | -3.49              | Glu254       | 1.28               |
| Phe4         | -1.65              |              |                    |
| Ser7         | -0.81              |              |                    |
| Cys21        | -0.99              |              |                    |
| Ile23        | -2.16              |              |                    |
| Ile26        | -1.58              |              |                    |
| Val27        | -1.75              |              |                    |
| Trp87        | -1.51              |              |                    |
| Tyr90        | -1.92              |              |                    |
| Leu91        | -1.92              |              |                    |
| Glu174       | -0.86              |              |                    |
| Leu176       | -2.15              |              |                    |
| Tyr179       | -1.66              |              |                    |
| Pro180       | -0.57              |              |                    |
| Glu181       | -1.72              |              |                    |
| Leu183       | -0.74              |              |                    |
| Gln184       | -1.73              |              |                    |
| Trp187       | -2.34              |              |                    |
| Pro188       | -1.48              |              |                    |
| Arg191       | -0.69              |              |                    |
| Arg272       | -2.23              |              |                    |
| Leu273       | -0.65              |              |                    |
| Ser276       | -1.27              |              |                    |
| Isoform 2    |                    |              |                    |
|              | [<-0.5204 kJ/mol]  |              | [>0.02973 kJ/mol]  |
| Trp24 (-8)   | -1.67              | Met1 (-31)   | 0.1                |
| Leu49 (17)   | -2.02              | Arg2 (-30)   | 0.14               |
| Ala50 (18)   | -0.9               | Tyr54 (22)   | 0.12               |
| Glu51 (19)   | -1.13              | Lys201 (169) | 0.06               |
| Ala52 (20)   | -1.64              | Lys203 (171) | 0.08               |
| Ile55 (23)   | -4.1               | Glu204 (172) | 0.03               |
| Ile58 (26)   | -0.52              | Glu206 (174) | 0.29               |
| Val59 (27)   | -1.22              | Lys289 (257) | 0.07               |
| Trp119 (87)  | -1.14              | Ser296 (264) | 0.03               |
| Tyr122 (90)  | -1.52              | Lys301 (269) | 0.04               |
| Leu123 (91)  | -0.91              | Ser308 (276) | 0.03               |
| Phe199 (167) | -2.29              | Glu311 (279) | 0.09               |
| Cys207 (175) | -0.53              |              |                    |
| Leu208 (176) | -4.62              |              |                    |

|              |       |
|--------------|-------|
| Gly209 (177) | -0.53 |
| Tyr211 (179) | -1.38 |
| Trp219 (187) | -0.65 |
| Pro220 (188) | -1.16 |

### Isoform 3

| [<-0.4363 kJ/mol] |       | [>0.0163 kJ/mol] |      |
|-------------------|-------|------------------|------|
| Ala27 (20)        | -0.94 | Met1 (-6)        | 0.08 |
| Cys28 (21)        | -1.18 | Ser3 (-4)        | 0.01 |
| Tyr29 (22)        | -3.41 | Asn18 (11)       | 0.01 |
| Ile30 (23)        | -3.26 | Asp32 (25)       | 0.01 |
| Val34 (27)        | -1.58 | His105 (98)      | 0.02 |
| Tyr97 (90)        | -1.1  | Lys110 (103)     | 0.04 |
| Leu98 (91)        | -0.62 | Lys176 (169)     | 0.04 |
| Lys178 (171)      | -0.48 | Gln177 (170)     | 0.06 |
| Asn180 (173)      | -0.48 | Gln191 (184)     | 0.01 |
| Glu181 (174)      | -2.43 | Arg198 (191)     | 0.05 |
| Cys182 (175)      | -0.63 | Asn199 (192)     | 0.01 |
| Leu183 (176)      | -2.21 | Glu261 (254)     | 0.02 |
| Cys272 (265)      | -0.47 | Lys264 (257)     | 0.05 |
| Lys276 (269)      | -0.57 | Ser283 (276)     | 0.19 |
| Arg279 (272)      | -1.91 | Glu286 (279)     | 0.05 |
| Leu280 (273)      | -0.7  |                  |      |

### Isoform 4

| [<-0.6451 kJ/mol] |       | [>0.0574 kJ/mol] |      |
|-------------------|-------|------------------|------|
| Arg2 (-30)        | -2.48 | Met1 (-31)       | 0.45 |
| Leu49 (17)        | -2.46 | Glu6 (-26)       | 0.25 |
| Ala50 (18)        | -0.72 | Asp47 (15)       | 0.08 |
| Cys53 (21)        | -2.25 | Lys203 (171)     | 0.06 |
| Tyr54 (22)        | -0.86 | Glu226 (194)     | 0.41 |
| Trp119 (87)       | -1.71 | Thr227 (195)     | 0.42 |
| Phe141 (109)      | -1.97 | Lys289 (257)     | 0.07 |
| Phe142 (110)      | -1.68 |                  |      |
| Gln196 (164)      | -1.47 |                  |      |
| Phe199 (167)      | -2.09 |                  |      |
| Thr200 (168)      | -1.34 |                  |      |
| Glu206 (174)      | -1.46 |                  |      |
| Cys207 (175)      | -2.46 |                  |      |
| Leu208 (176)      | -3.01 |                  |      |
| Gly209 (177)      | -3.13 |                  |      |
| Asp210 (178)      | -1.52 |                  |      |
| Tyr211 (179)      | -1.09 |                  |      |
| Arg223 (191)      | -1.86 |                  |      |
| Tyr279 (247)      | -0.86 |                  |      |
| Ile283 (251)      | -1.9  |                  |      |
| Glu286 (254)      | -0.68 |                  |      |
| Thr287 (255)      | -0.72 |                  |      |
| Leu290 (258)      | -1.24 |                  |      |
| Tyr291 (259)      | -1.85 |                  |      |
| Asp292 (260)      | -0.67 |                  |      |
| Arg304 (272)      | -1.34 |                  |      |

**Table S5.** The most significant contributions of binding free energy via MM-GBSA of the residues of isoform 1, 2, 3, and 4 for the structural models of the CX3CR1/cndG complexes from the HADDOCK server. The values in brackets denote the value of average plus standard deviation calculated on the contribution of all amino acid residues. The most significant energy contributions correspond to values greater than that in the brackets. The number in parentheses corresponds to reference numbering of isoform 1.

| Residue          | Favorable energy  | Residue      | Unfavorable energy |
|------------------|-------------------|--------------|--------------------|
| <b>Isoform 1</b> |                   |              |                    |
|                  | [<-0.3012 kJ/mol] |              | [>0.09002 kJ/mol]  |
| Met1             | -1.33             | Glu10        | 0.51               |
| Asp2             | -0.51             | Glu172       | 0.12               |
| Gln3             | -1.05             | Glu174       | 1.28               |
| Glu6             | -0.81             | Tyr279       | 0.27               |
| Ser7             | -0.65             | Arg268       | 0.1                |
| Thr9             | -1.07             | Arg272       | 0.09               |
| Tyr14            | -1.46             |              |                    |
| Leu17            | -1.82             |              |                    |
| Ala18            | -0.78             |              |                    |
| Tyr22            | -1.55             |              |                    |
| Ile23            | -1.53             |              |                    |
| Lys171           | -0.84             |              |                    |
| Asn173           | -0.37             |              |                    |
| Leu176           | -1.6              |              |                    |
| Gly177           | -0.34             |              |                    |
| Gln184           | -0.85             |              |                    |
| <b>Isoform 2</b> |                   |              |                    |
|                  | [<-0.4781 kJ/mol] |              | [>0.0409 kJ/mol]   |
| Leu49 (17)       | -2.63             | Met1 (-31)   | 0.08               |
| Aal50 (18)       | -1.59             | Arg2 (-30)   | 0.04               |
| Glu51 (19)       | -0.81             | Arg25 (-7)   | 0.11               |
| Ala52 (20)       | -1.08             | Asp57 (25)   | 0.04               |
| Tyr54 (22)       | -3.14             | Glu126 (94)  | 0.05               |
| Ile55 (23)       | -2.83             | Lys135 (103) | 0.07               |
| Phe199 (167)     | -0.97             | Lys201 (169) | 0.11               |
| Leu208 (176)     | -1.36             | Lys203 (171) | 0.59               |
| Gly209 (177)     | -1.04             | Glu204 (172) | 0.04               |
| Asp210 (178)     | -0.47             | Glu206 (174) | 0.1                |
| Tyr211 (179)     | -2.04             | Glu286 (254) | 0.04               |
| Gln216 (184)     | -1.34             | Asp292 (260) | 0.05               |
| Glu217 (185)     | -1.63             | Asp302 (270) | 0.04               |
| Pro220 (188)     | -1.52             | Glu311 (279) | 0.05               |
| Cys297 (265)     | -1.2              |              |                    |
| Arg300 (268)     | -3.02             |              |                    |
| Arg304 (272)     | -0.76             |              |                    |
| <b>Isoform 3</b> |                   |              |                    |
|                  | [<-0.3412 kJ/mol] |              | [>0.0705 kJ/mol]   |



**Table S7.** The most significant contributions of binding free energy via MM-GBSA of the residues of cndG for the four structural models of the CX3CR1/cndG complexes from the HADDOCK server. The values in brackets denote the value of average plus standard deviation calculated on the contribution of all amino acid residues. The most significant energy contributions correspond to values greater than that in the brackets.

| <b>Residue<br/>cndG/<br/>isoform1</b> | <b>energy<br/>[-2.9214]<br/>kJ/mol</b> | <b>Residue<br/>cndG/<br/>isoform2</b> | <b>energy<br/>[-2.6231]<br/>kJ/mol</b> | <b>Residue<br/>cndG/<br/>isoform3</b> | <b>energy<br/>[-2.9178]<br/>kJ/mol</b> | <b>Residue<br/>cndG/<br/>isoform4</b> | <b>energy<br/>[-1.7827]<br/>kJ/mol</b> |
|---------------------------------------|----------------------------------------|---------------------------------------|----------------------------------------|---------------------------------------|----------------------------------------|---------------------------------------|----------------------------------------|
| Asn179                                | -3.38                                  | Val171                                | -2.96                                  | Asn178                                | -4.01                                  | Asn178                                | -4.23                                  |
| Trp183                                | -5.54                                  | Ile175                                | -3.04                                  | Asn179                                | -3.59                                  | Pro180                                | -2.83                                  |
|                                       |                                        | Asn179                                | -2.81                                  | Trp183                                | -3.83                                  |                                       |                                        |
|                                       |                                        | Trp183                                | -3.07                                  |                                       |                                        |                                       |                                        |
|                                       |                                        | Arg188                                | -3.18                                  |                                       |                                        |                                       |                                        |
|                                       |                                        | Ile189                                | -2.83                                  |                                       |                                        |                                       |                                        |
